# Supplementary material for: Phase I Study of a B Cell-Based and Monocyte-Based Immunotherapeutic Vaccine, BVAC-C in Human Papillomavirus Type 16- or 18-Positive Recurrent Cervical Cancer
Source: MDPI journal article supplement (doi:10.3390/jcm9010147), 2020-01-05
Supplement: s1 [file s1]

**Supplemental Material**

**Table 1.** Scheduled visits for treatment, clinical and immunological assessment in the BVAC-C phase I trial.

| Study timeline          | Screening     | Visit 1      | Visit 2     |             | Visit 3     | Visit 4     |             | Visit 5     | Visit 6     |             | Visit 7      | Visit F      |
|-------------------------|---------------|--------------|-------------|-------------|-------------|-------------|-------------|-------------|-------------|-------------|--------------|--------------|
|                         | -6 w<br>~-1 w | -2 w<br>~4 d | 0 w<br>±2 d | 0 w<br>+1 d | 2 w<br>±2 d | 4 w<br>±2 d | 4 w<br>+1 d | 6 w<br>±2 d | 8 w<br>±2 d | 8 w<br>+1 d | 10 w<br>±2 d | 12 w<br>±2 d |
| Enrollment              | •             |              |             |             |             |             |             |             |             |             |              |              |
| Lymphapheresis          |               | •            |             |             |             |             |             |             |             |             |              |              |
| BVAC-C injection        |               |              | •           |             |             | •           |             |             | •           |             |              |              |
| AE assessment           | •             | •            | •           | •           | •           | •           | •           | •           | •           | •           | •            | •            |
| Serum cytokine assay    |               |              | •           | •           |             |             | •           | •           |             | •           | •            |              |
| CD4/CD8 T cell assay    | •             |              |             |             | •           | •           |             | •           | •           |             | •            | •            |
| Radiological assessment | •             |              |             |             |             |             |             |             |             |             |              | •            |

Abbreviations: AE = Adverse Event; w = week; d = day; F = final

**Table 2.** Adverse events of any grade observed in the study ( $n = 11$ ).

| Adverse events                                       | $1 \times 10^7$ ( $n = 4$ ) |    |    | $4 \times 10^7$ ( $n = 3$ ) |    |    | $1 \times 10^8$ ( $n = 4$ ) |    |    | Total ( $n = 11$ ) |        |        |
|------------------------------------------------------|-----------------------------|----|----|-----------------------------|----|----|-----------------------------|----|----|--------------------|--------|--------|
|                                                      | G1                          | G2 | G3 | G1                          | G2 | G3 | G1                          | G2 | G3 | G1 (%)             | G2 (%) | G3 (%) |
| Respiratory, thoracic and mediastinal disorders      |                             |    |    |                             |    |    |                             |    |    |                    |        |        |
| Oropharyngeal pain                                   | 1                           | 0  | 0  | 0                           | 0  | 0  | 0                           | 0  | 0  | 1 (9)              | 0      | 0      |
| Cough                                                | 0                           | 0  | 0  | 1                           | 0  | 0  | 0                           | 0  | 0  | 1 (9)              | 0      | 0      |
| Productive cough                                     | 0                           | 0  | 0  | 1                           | 0  | 0  | 0                           | 0  | 0  | 1 (9)              | 0      | 0      |
| Dyspnea                                              | 0                           | 0  | 0  | 1                           | 0  | 0  | 0                           | 0  | 0  | 1 (9)              | 0      | 0      |
| Nervous system disorders                             |                             |    |    |                             |    |    |                             |    |    |                    |        |        |
| Headache                                             | 1                           | 0  | 0  | 1                           | 0  | 0  | 1                           | 0  | 0  | 3 (27)             | 0      | 0      |
| Musculoskeletal and connective tissue disorders      |                             |    |    |                             |    |    |                             |    |    |                    |        |        |
| Myalgia                                              | 2                           | 1  | 0  | 1                           | 0  | 0  | 2                           | 0  | 0  | 5 (45)             | 1 (9)  | 0      |
| Pain in extremity                                    | 0                           | 0  | 1  | 0                           | 0  | 0  | 0                           | 0  | 0  | 0                  | 0      | 1 (9)  |
| Bone pain                                            | 1                           | 0  | 0  | 0                           | 0  | 0  | 0                           | 0  | 0  | 1 (9)              | 0      | 0      |
| Back pain                                            | 0                           | 0  | 0  | 0                           | 0  | 0  | 0                           | 1  | 0  | 0                  | 1 (9)  | 0      |
| Musculoskeletal pain                                 | 0                           | 0  | 0  | 0                           | 0  | 0  | 0                           | 1  | 0  | 0                  | 1 (9)  | 0      |
| General disorders and administration site conditions |                             |    |    |                             |    |    |                             |    |    |                    |        |        |
| Flank pain                                           | 1                           | 0  | 0  | 0                           | 0  | 0  | 0                           | 0  | 0  | 1 (9)              | 0      | 0      |
| Pyrexia                                              | 1                           | 0  | 0  | 3                           | 0  | 0  | 3                           | 0  | 0  | 7 (63)             | 0      | 0      |
| Asthenia                                             | 0                           | 0  | 0  | 2                           | 0  | 1  | 0                           | 0  | 0  | 2 (18)             | 0      | 1 (9)  |
| Edema peripheral                                     | 0                           | 0  | 0  | 1                           | 0  | 0  | 0                           | 0  | 0  | 1 (9)              | 0      | 0      |
| Chills                                               | 0                           | 0  | 0  | 0                           | 0  | 0  | 2                           | 0  | 0  | 2 (18)             | 0      | 0      |
| Fatigue                                              | 0                           | 0  | 0  | 0                           | 0  | 0  | 1                           | 0  | 0  | 1 (9)              | 0      | 0      |

|                                             |   |   |   |   |   |   |   |   |   |               |               |               |
|---------------------------------------------|---|---|---|---|---|---|---|---|---|---------------|---------------|---------------|
| Gastrointestinal disorders                  |   |   |   |   |   |   |   |   |   |               |               |               |
| Constipation                                | 1 | 0 | 0 | 0 | 0 | 0 | 1 | 0 | 0 | <b>2 (18)</b> | <b>0</b>      | <b>0</b>      |
| Dyspepsia                                   | 0 | 0 | 0 | 1 | 0 | 0 | 1 | 0 | 0 | <b>2 (18)</b> | <b>0</b>      | <b>0</b>      |
| Abdominal distension                        | 0 | 0 | 0 | 1 | 1 | 0 | 0 | 0 | 0 | <b>1 (9)</b>  | <b>1 (9)</b>  | <b>0</b>      |
| Ileus                                       | 0 | 0 | 0 | 1 | 0 | 1 | 0 | 0 | 0 | <b>1 (9)</b>  | <b>0</b>      | <b>1 (9)</b>  |
| Nausea                                      | 0 | 0 | 0 | 1 | 0 | 0 | 0 | 0 | 0 | <b>1 (9)</b>  | <b>0</b>      | <b>0</b>      |
| Stomatitis                                  | 0 | 0 | 0 | 1 | 1 | 0 | 0 | 0 | 0 | <b>1 (9)</b>  | <b>1 (9)</b>  | <b>0</b>      |
| Diarrhea                                    | 0 | 0 | 0 | 0 | 0 | 0 | 0 | 1 | 0 | <b>0</b>      | <b>1 (9)</b>  | <b>0</b>      |
| Vomiting                                    | 0 | 0 | 0 | 0 | 0 | 0 | 1 | 0 | 0 | <b>1 (9)</b>  | <b>0</b>      | <b>0</b>      |
| Metabolism and nutrition disorders          |   |   |   |   |   |   |   |   |   |               |               |               |
| Decreased appetite                          | 0 | 1 | 0 | 0 | 0 | 0 | 0 | 0 | 0 | <b>0</b>      | <b>1 (9)</b>  | <b>0</b>      |
| Hyperkalemia                                | 0 | 0 | 0 | 0 | 1 | 0 | 0 | 0 | 0 | <b>0</b>      | <b>1 (9)</b>  | <b>0</b>      |
| Hypoalbuminemia                             | 0 | 0 | 0 | 0 | 2 | 1 | 0 | 0 | 0 | <b>0</b>      | <b>2 (18)</b> | <b>1 (9)</b>  |
| Hypophagia                                  | 0 | 0 | 0 | 2 | 0 | 1 | 0 | 0 | 0 | <b>2 (18)</b> | <b>0</b>      | <b>1 (9)</b>  |
| Neoplasms benign, malignant and unspecified |   |   |   |   |   |   |   |   |   |               |               |               |
| Skin papilloma                              | 0 | 1 | 0 | 0 | 0 | 0 | 0 | 0 | 0 | <b>0</b>      | <b>1 (9)</b>  | <b>0</b>      |
| Blood and lymphatic system disorders        |   |   |   |   |   |   |   |   |   |               |               |               |
| Anemia                                      | 0 | 0 | 0 | 1 | 1 | 1 | 1 | 2 | 1 | <b>2 (18)</b> | <b>3 (27)</b> | <b>2 (18)</b> |
| Hepatobiliary disorders                     |   |   |   |   |   |   |   |   |   |               |               |               |
| Ascites                                     | 0 | 0 | 0 | 0 | 0 | 1 | 0 | 0 | 0 | <b>0</b>      | <b>0</b>      | <b>1 (9)</b>  |
| Renal and urinary disorders                 |   |   |   |   |   |   |   |   |   |               |               |               |
| Bladder infections and inflammation         |   |   |   |   |   |   |   |   |   |               |               |               |
| Nocturia                                    | 0 | 0 | 0 | 0 | 1 | 0 | 1 | 0 | 0 | <b>1 (9)</b>  | <b>1 (9)</b>  | <b>0</b>      |
| Ureteric stenosis                           | 0 | 0 | 0 | 1 | 0 | 0 | 0 | 0 | 0 | <b>1 (9)</b>  | <b>0</b>      | <b>0</b>      |
| Incontinence                                | 0 | 0 | 0 | 0 | 0 | 0 | 1 | 0 | 0 | <b>1 (9)</b>  | <b>0</b>      | <b>0</b>      |

|                                                |   |   |   |   |   |   |   |   |   |              |              |              |  |
|------------------------------------------------|---|---|---|---|---|---|---|---|---|--------------|--------------|--------------|--|
| Investigations                                 |   |   |   |   |   |   |   |   |   |              |              |              |  |
| C-reactive protein increased                   | 0 | 0 | 0 | 0 | 0 | 0 | 1 | 0 | 0 | <b>1 (9)</b> | <b>0</b>     | <b>0</b>     |  |
| Immune system disorders                        |   |   |   |   |   |   |   |   |   |              |              |              |  |
| Cytokine release syndrome                      | 0 | 0 | 0 | 0 | 0 | 0 | 0 | 1 | 0 | <b>0</b>     | <b>1 (9)</b> | <b>0</b>     |  |
| Injury, poisoning and procedural complications |   |   |   |   |   |   |   |   |   |              |              |              |  |
| Ligament sprain                                | 0 | 0 | 0 | 0 | 0 | 0 | 1 | 0 | 0 | <b>1 (9)</b> | <b>0</b>     | <b>0</b>     |  |
| Reproductive system and breast disorders       |   |   |   |   |   |   |   |   |   |              |              |              |  |
| Pelvic inflammatory disease                    | 0 | 0 | 0 | 0 | 0 | 0 | 0 | 1 | 1 | <b>0</b>     | <b>1 (9)</b> | <b>1 (9)</b> |  |

---
